# Supplementary material for: Binary nonmetal S and P-co-doping into mesoporous PtPd nanocages boosts oxygen reduction electrocatalysis
Source: Royal Society of Chemistry journal article supplement (doi:10.1039/d0nr02686g), 2020-01-01
Supplement: d0nr02686g1.pdf [file d0nr02686g1.pdf]

## Electronic Supplementary Information

### Characterizations

Hitachi S-4800 scanning electron microscope (SEM) was used to characterize the morphology. JEOL-2100F transmission electron microscopy (TEM) was employed to investigate the structure and composition of catalysts. X-ray diffraction (XRD) pattern was conducted on a PANalytical X'Pert Powder with Cu K $\alpha$  radiation X-ray source ( $\lambda = 0.154056$  nm). X-ray photoelectron spectra (XPS) spectrum was carried out by ESCALAB MK II spectrometer (VG Scientific, UK) with Al K $\alpha$  X-ray excitation.

### Electrochemical investigations

The electrochemical measurements were carried out on a CHI 852D electrochemical analyzer with a three-electrodes cell which includes a Pt wire, a Ag/AgCl (3 M KCl), and a rotating disk electrode (RDE) as a counter electrode, reference electrode, and working electrode, respectively. The working electrode was modified with different catalysts (2  $\mu$ g of catalyst), and then coated with 3  $\mu$ L of Nafion (0.5%), left to fully dry before the measurements. The linear sweep voltammograms (LSVs) are performed on an RRDE-3A rotation system (ALS Co. Ltd, Japan) in an O<sub>2</sub>-saturated 0.1 M HClO<sub>4</sub> at a sweep rate of 5 mV s<sup>-1</sup> with a rotation speed of 1600 rpm. The electron transfer number ( $n$ ) is calculated by the Koutecky-Levich equation as follow:

$$\frac{1}{j} = \frac{1}{j_k} + \frac{1}{j_d}$$

$$j_d = 0.2nFD^{2/3}\nu^{1/6}\omega^{1/2} C_{O_2}$$

Where,  $j$ ,  $j_k$ , and  $j_d$  are the measured, kinetic, and diffusion currents, respectively.  $F$  is the Faraday's constant (96485 C mol<sup>-1</sup>).  $D$  is the diffusion coefficient of O<sub>2</sub> ( $1.93 \times 10^{-5}$  cm<sup>2</sup> s<sup>-1</sup>),  $\nu$  is the kinetic viscosity ( $1.13 \times 10^{-2}$  cm<sup>2</sup> s<sup>-1</sup>),  $\omega$  is the rotation speed of electrode (rpm), and  $C_{O_2}$  is the bulk concentration of O<sub>2</sub> dissolved in 0.1 M HClO<sub>4</sub> ( $1.22 \times 10^{-3}$  mol L<sup>-1</sup>).

The electrochemical active surface areas (ECSAs) are calculated using the following equation:

$$\text{ECSA} = Q / m \times 210$$

Where  $m$  is the Pt loading on the electrode surface, 210  $\mu$ C cm<sup>-2</sup> is the charge required for monolayer adsorption of hydrogen on the Pt surface, and  $Q$  is the charge in the Hupd adsorption/desorption area obtained after the double layer correction.

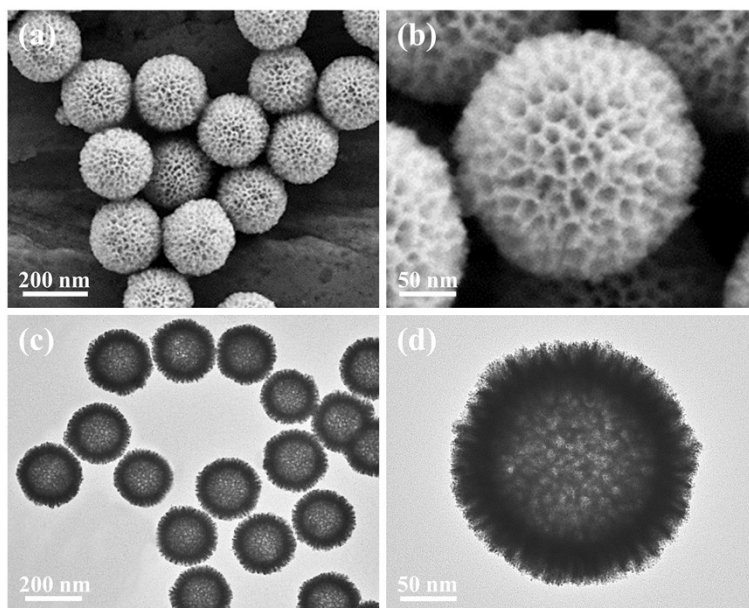

**Fig. S1** (a, b) SEM images and (c, d) TEM images of the PtPd mNCs.

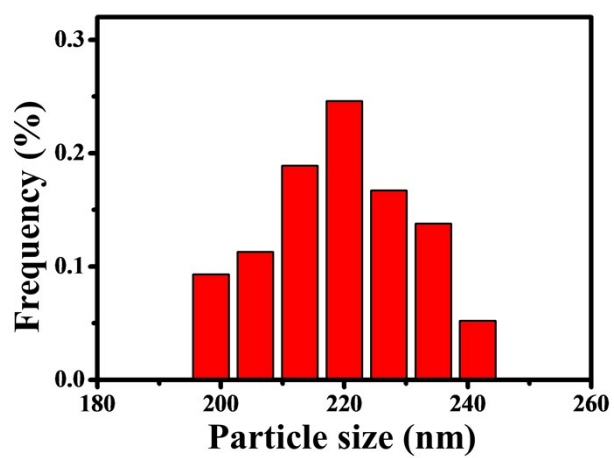

**Fig. S2** The size distribution histogram of the PtPdSP mNCs.

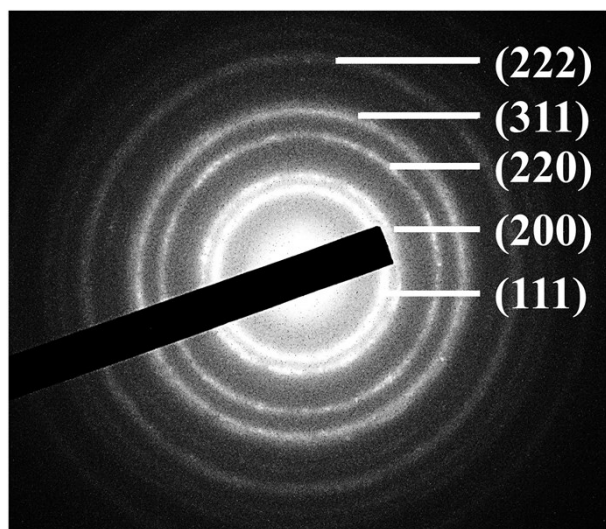

**Fig. S3** SAED pattern of the PtPdSP mNCs.

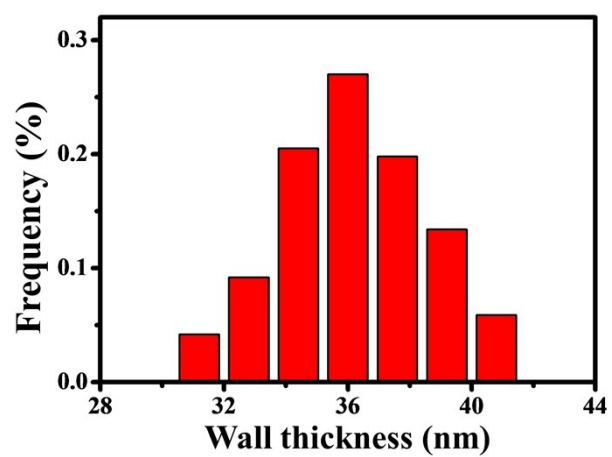

**Fig. S4** The wall thickness distribution histogram of the PtPdSP mNCs.

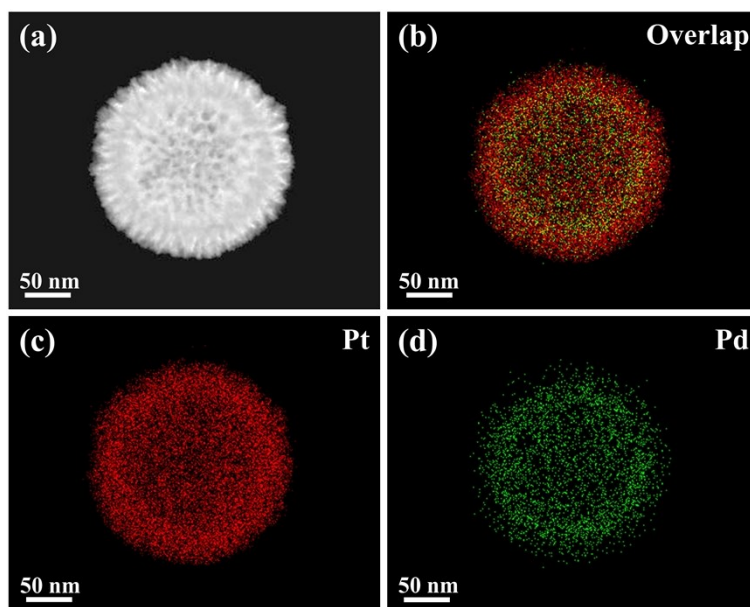

**Fig. S5** (a) HAADF-STEM image of a PtPd mNC. (b-d) Elemental mapping images of the PtPd mNC.

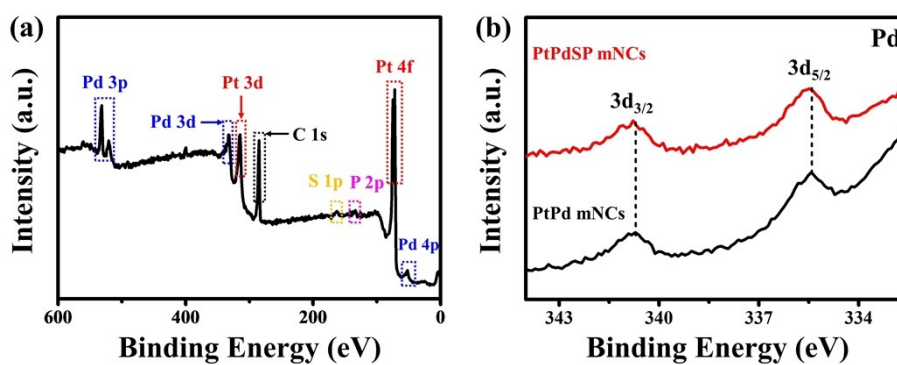

**Fig. S6** (a) XPS spectrum for the PtPdSP mNCs. (b) XPS spectra of Pd 3d for PtPdSP mNCs and PtPd mNCs.

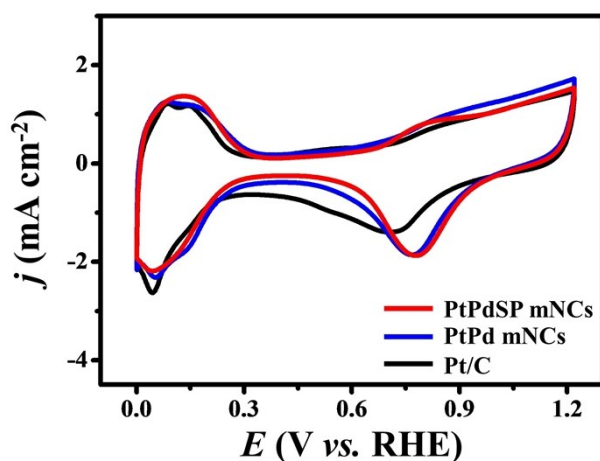

**Fig. S7** CV curves of the three catalysts in an  $N_2$ -saturated 0.1 M  $HClO_4$  solution.

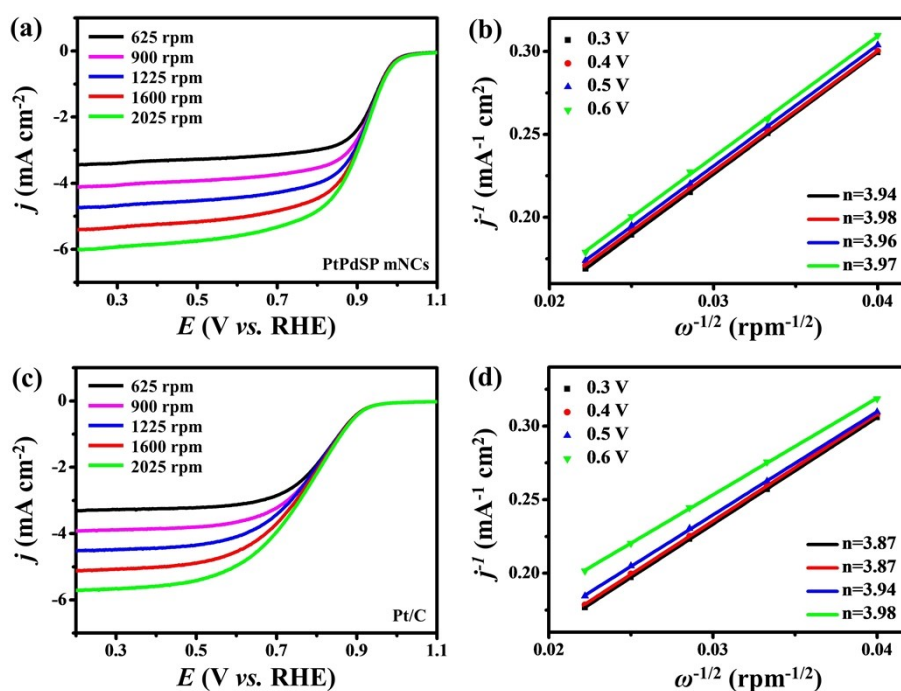

**Fig. S8** (a) ORR polarization curves with different RDE rotation rates, and (b) the electron transfer numbers at different potentials of the PtPdSP mNCs. (c) ORR polarization curves with different RDE rotation rates, and (d) the electron transfer numbers at different potentials of the Pt/C.

**Table S1** The comparisons of the ORR performance of the PtPdSP mNCs with some recently reported Pt-based catalysts.

| Catalyst                               | $E_{\text{onset}}$ (V vs. RHE) | $E_{1/2}$ (V vs. RHE) | Ref.             |
|----------------------------------------|--------------------------------|-----------------------|------------------|
| <b>PtPdSP mNCs</b>                     | <b>1.03</b>                    | <b>0.91</b>           | <b>This work</b> |
| PtAu nanoparticles                     | 0.98                           | 0.83                  | 1                |
| Porous PtAg hollow chain-like networks | 0.933                          | 0.857                 | 2                |
| PtCo nanomyriapods                     | 0.92                           | 0.82                  | 3                |
| PtPd networks                          | 0.89                           | /                     | 4                |
| Nanoporous Pt                          | 0.85                           | /                     | 5                |
| Pt nanoparticles                       | 0.85                           | /                     | 6                |
| Dodecahedral CuPt nanoframes           | /                              | 0.87                  | 7                |
| MCS Au@PtNi NPs                        | /                              | 0.838                 | 8                |

**Table S2** The comparisons of the specific activity (SA) and mass activity (MA) of the PtPdSP mNCs with some recently reported Pt-based catalysts.

| Catalyst                                                              | SA ( mA cm <sup>-2</sup> ) | MA ( A mg <sup>-1</sup> Pt ) | Ref.             |
|-----------------------------------------------------------------------|----------------------------|------------------------------|------------------|
| <b>PtPdSP mNCs</b>                                                    | <b>1.10</b>                | <b>0.56</b>                  | <b>This work</b> |
| PtCu/CNT                                                              | 0.45941                    | 0.30525                      | 9                |
| Pt <sub>3</sub> Ni <sub>3</sub> MoN/C                                 | 0.1554                     | 0.53941                      | 10               |
| Pt/Pd/C                                                               | 1.172                      | 0.434                        | 11               |
| NP-Pt <sub>75</sub> Pd <sub>25</sub>                                  | 0.39                       | 0.25                         | 12               |
| Au-Pd-Pt NFs/rGO                                                      | 0.479                      | 0.212                        | 13               |
| Pt-Pd-Ag/C nanoflowers                                                | 0.526                      | 0.206                        | 14               |
| np-PtCuTi catalyst                                                    | 0.84                       | 0.256                        | 15               |
| Pt <sub>5</sub> Cu <sub>76</sub> Co <sub>11</sub> Ni <sub>8</sub> NTs | 0.18                       | 0.19                         | 16               |

## References

- 1 W. Wu, Z. Tang, K. Wang, Z. Liu, L. Li and S. Chen, *Electrochim. Acta*, 2018, **260**, 168–176.
- 2 A. Wang, L. Liu, X. Lin, J. Yuan and J. Feng, *Electrochim. Acta*, 2017, **245**, 883–892.
- 3 L. Jiang, X. Huang, A. Wang, X. Li, J. Yuan and J. Feng, *J. Mater. Chem. A.*, 2017, **5**, 10554–10560.
- 4 Y. Shi, L. Mei, A. Wang, T. Yuan, S. Chen and J. Feng, *J. Colloid Interf. Sci.*, 2017, **504**, 363–370.
- 5 B. Geboes, J. Ustarroz, K. Sentosun, H. Vanrompay, A. Hubin, S. Bals and T. Breugelmans, *ACS Catal.*, 2016, **6**, 5856–5864.
- 6 R. Devivaraprasad, R. Ramesh, N. Naresh, T. Kar, R. Singh and M. Neergat, *Langmuir*, 2014, **30**, 8995–9006.
- 7 L. Lyu, Y. Kao, D. Cullen, B. Sneed, Y. Chuang and C. Kuo, *Chem. Mater.*, 2017, **29**, 5681–5692.
- 8 Q. Shi, C. Zhu, S. Fu, D. Du and Y. Lin, *ACS Appl. Mater. Interfaces*, 2016, **8**, 4739–4744.
- 9 H. El-Deeb and M. Bron, *Electrochim. Acta*, 2015, **164**, 315–322.
- 10 L. Luo, H. S. Abbo, S. J.J. Titinchi, P. Tsiakaras and S. Yin, *Int. J. Hydrogen energy*, 2019, **44**, 6582–6591.
- 11 N. Aoki, H. Inoue, T. Okawa, Y. Ikehata, A. Shirai, H. Daimon, T. Doi, Y. Orikasa, Y. Uchimoto, H. Jinnai, S. Inamoto, Y. Otsuka and M. Inaba, *Electrocatalysis*, 2018, **9**, 125–138.
- 12 H. Duan and C. Xu, *Electrochim. Acta*, 2015, **152**, 417–424.
- 13 L. Huang, Y. Han and S. Dong, *Chem. Commun.*, 2016, **52**, 8659–8662.
- 14 A. Chalgin, F. Shi, F. Li, Q. Xiang, W. Chen, C. Song, P. Tao, W. Shang, T. Deng and J. Wu, *CrystEngComm*, 2017, **19**, 6964–6971.
- 15 Y. Wang, K. Yin, J. Zhang, C. Si, X. Chen, L. Lv, W. Ma, H. Gao and Z. Zhang, *J. Mater. Chem. A*, 2016, **4**, 14657–14668.
- 16 L. Liu and E. Pippel, *Angew. Chem., Int. Ed.*, 2011, **50**, 2729–2733.
